# Supplementary material for: Oxygen-Sensitive Photo- and Radioluminescent Polyurethane Nanoparticles Modified with Octahedral Iodide Tungsten Clusters
Source: MDPI journal article supplement (doi:10.3390/nano12203580), 2022-10-12
Supplement: s1 [file s1]

Supplementary Materials

Article

# Oxygen-Sensitive Photo- and Radioluminescent Polyurethane Nanoparticles Modified with Octahedral Iodide Tungsten Clusters

Vyacheslav A. Bardin <sup>1</sup>, Yuri A. Vorotnikov <sup>1,\*</sup>, Dmitri V. Stass <sup>2,3</sup>, Natalya A. Vorotnikova <sup>1,\*</sup> and Michael A. Shestopalov <sup>1</sup>

**Citation:** Bardin, V.A.; Vorotnikov, Y.A.; Stass, D.V.; Vorotnikova, N.A.; Shestopalov, M.A. Oxygen-Sensitive Photo- and Radioluminescent Polyurethane Nanoparticles Modified with Octahedral Iodide Tungsten Clusters. *Nanomaterials* **2022**, *12*, 3580. <https://doi.org/10.3390/nano12203580>

<sup>1</sup> Nikolaev Institute of Inorganic Chemistry SB RAS, 3 Acad. Lavrentiev Ave., 630090 Novosibirsk, Russia

<sup>2</sup> Voevodsky Institute of Chemical Kinetics and Combustion SB RAS, 3 Institutskaya St., 630090 Novosibirsk, Russia

<sup>3</sup> Department of Physics, Novosibirsk State University, 2 Pirogova St., 630090 Novosibirsk, Russia

\* Correspondence: vorotnikov@niic.nsc.ru (Y.A.V.); vorotnikova@niic.nsc.ru (N.A.V.)

Academic Editor: Hideya Kawasaki

Received: 12 September 2022

Accepted: 10 October 2022

Published: 12 October 2022

**Publisher's Note:** MDPI stays neutral with regard to jurisdictional claims in published maps and institutional affiliations.

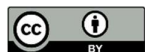

**Copyright:** © 2022 by the authors. Licensee MDPI, Basel, Switzerland. This article is an open access article distributed under the terms and conditions of the Creative Commons Attribution (CC BY) license (<https://creativecommons.org/licenses/by/4.0/>).

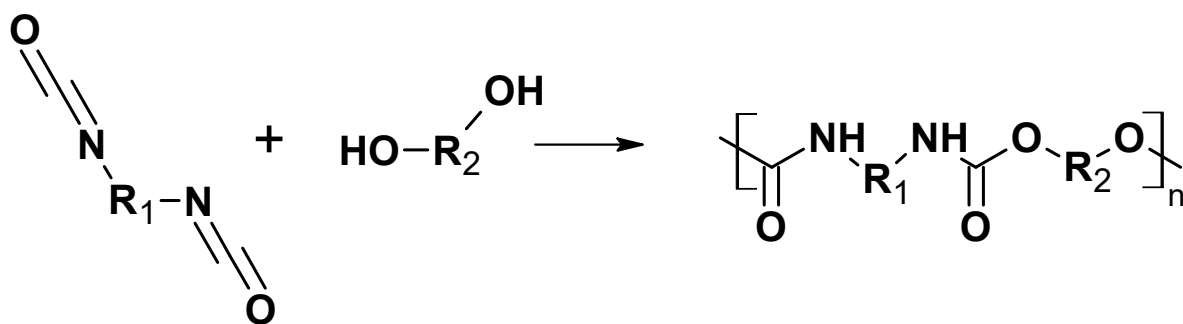

Figure S1. Scheme of polyurethane polymerisation.

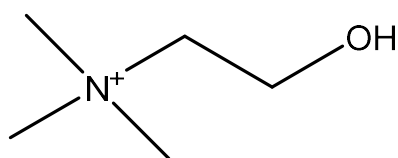

Figure S2. Structure representation of choline.

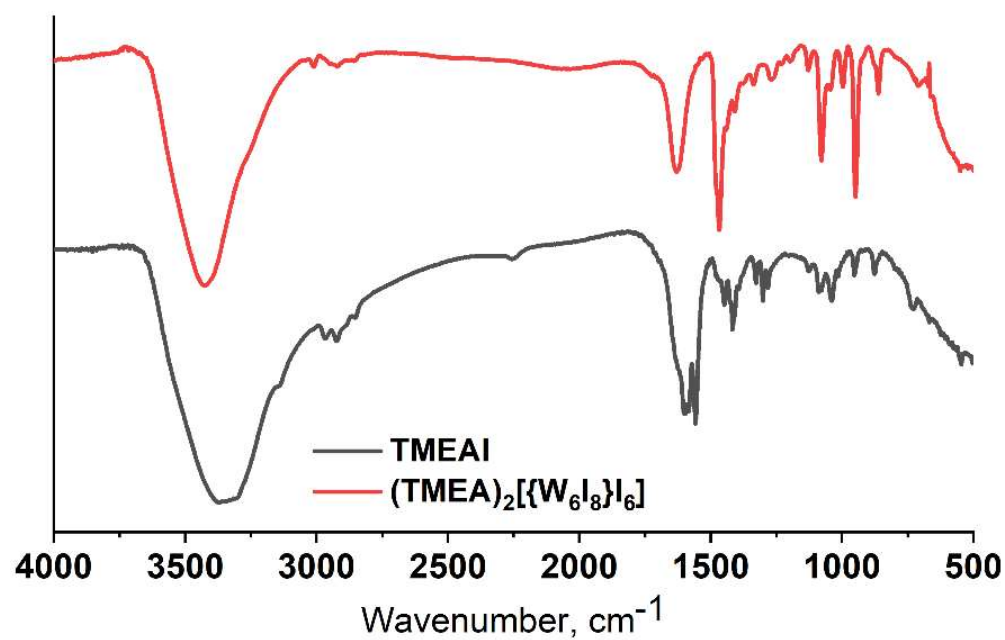

Figure S3. IR spectra for TMEAI and cluster 1.

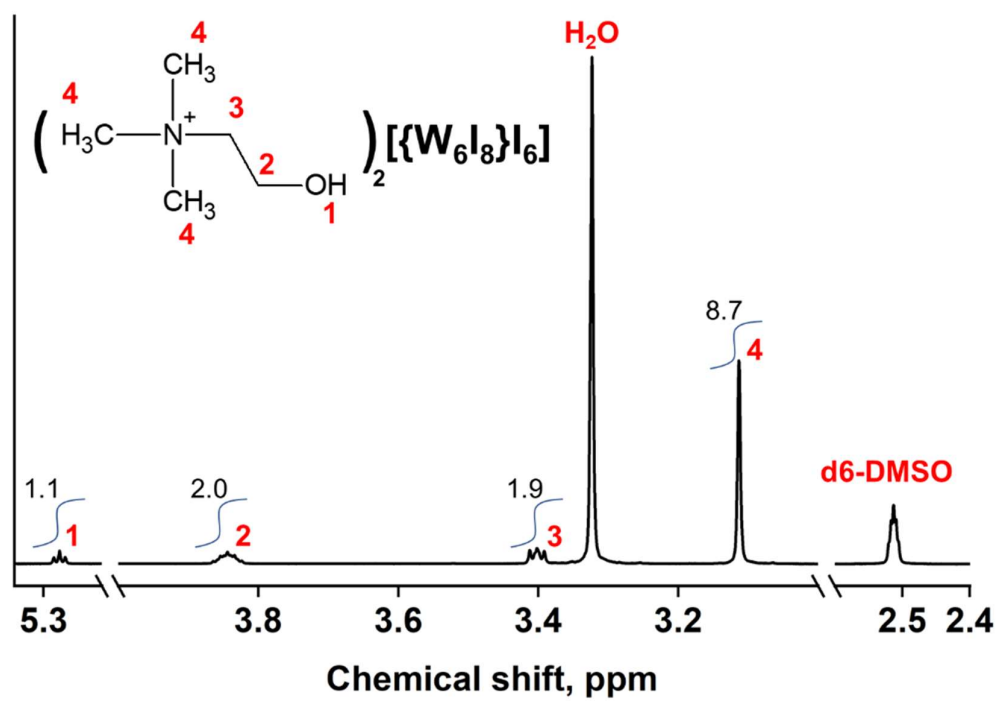

Figure S4.  $^1\text{H}$ -NMR spectra for  $(\text{TMEA})_2[\{\text{W}_6\text{I}_8\}\text{I}_6]$ .

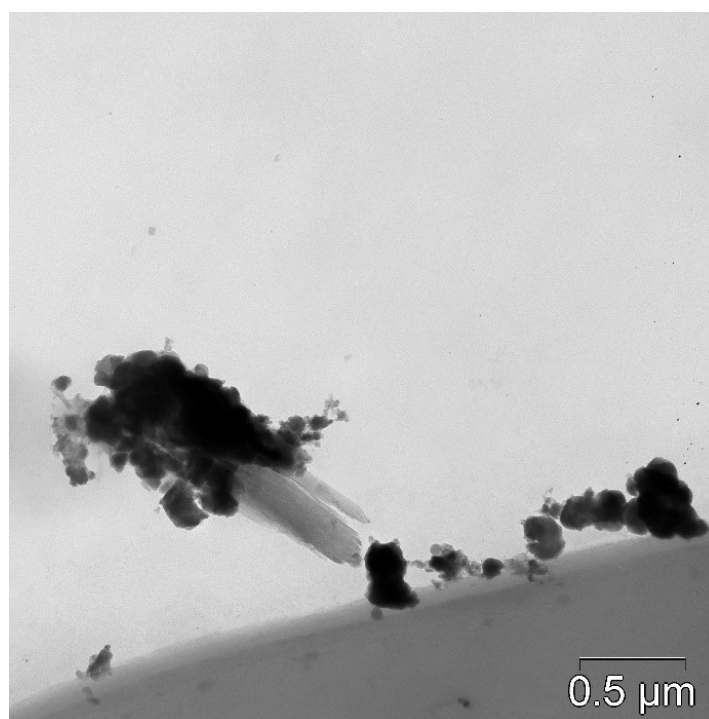

Figure S5. TEM picture of  $1^{\text{I}}$ @pU.

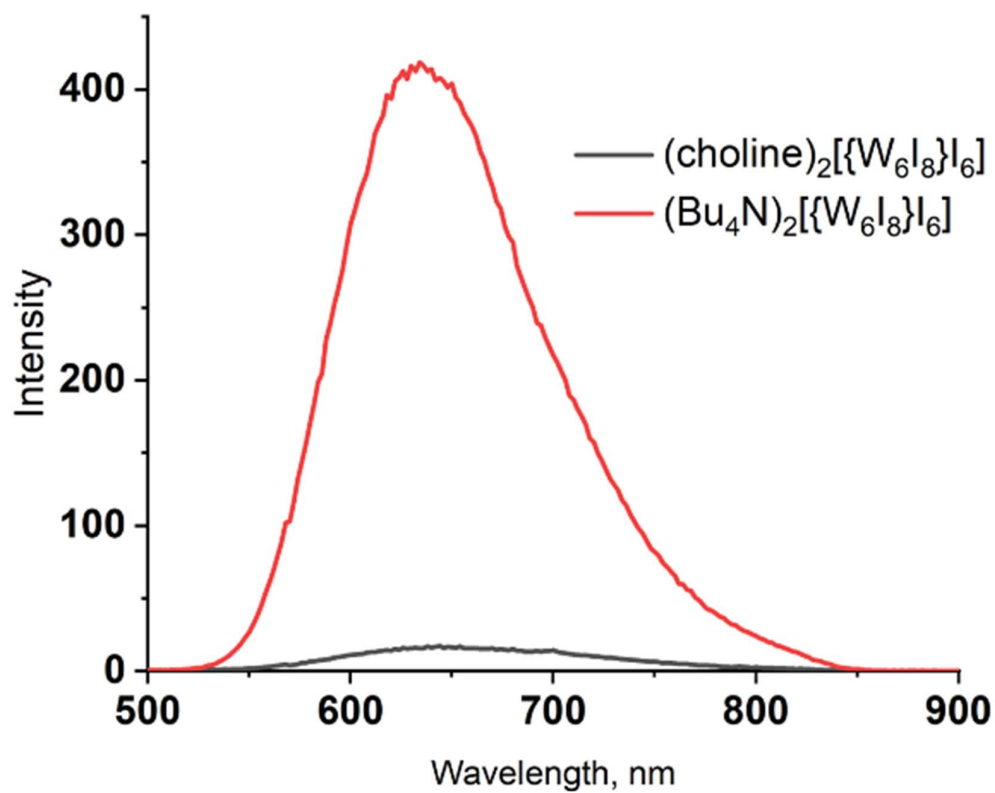

Figure S6. Comparison of luminescence spectra of tungsten clusters (choline)<sub>2</sub>[(W<sub>6</sub>I<sub>8</sub>)I<sub>6</sub>] and (Bu<sub>4</sub>N)<sub>2</sub>[(W<sub>6</sub>I<sub>8</sub>)I<sub>6</sub>] in solid state,  $\lambda_{\text{ex}} = 350 \text{ nm}$ ,  $5 \times 5$ .

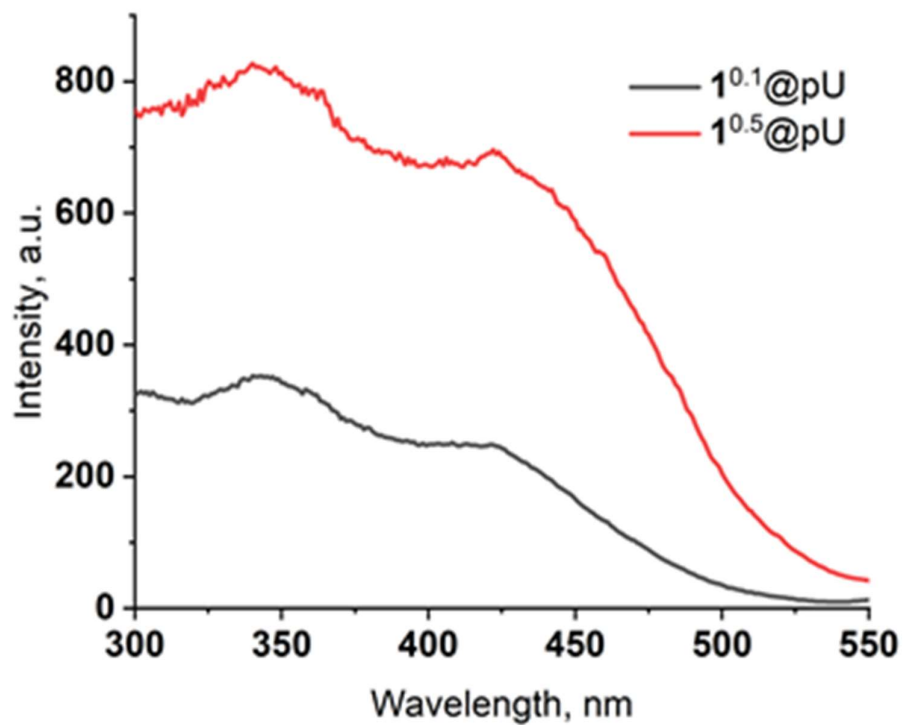

Figure S7. Excitation spectra for  $1^{0.1}@pU$  and  $1^{0.5}@pU$  in solid state,  $\lambda_{\text{em}} = 645 \text{ nm}$ .

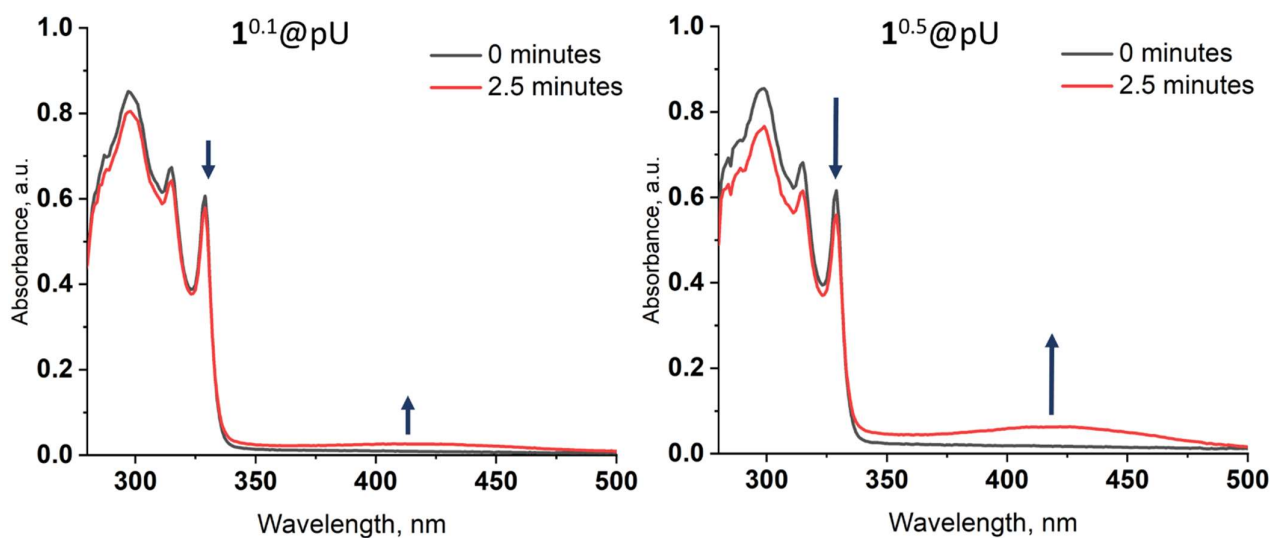

**Figure S8.** Characteristic UV-vis spectra of aqueous solutions (20 mL) of DHN (0.1 mM) in the presence of particles ( $0.05 \text{ mg mL}^{-1}$ )  $1^{0.1}@pU$  and  $1^{0.5}@pU$  before and after white light irradiation.

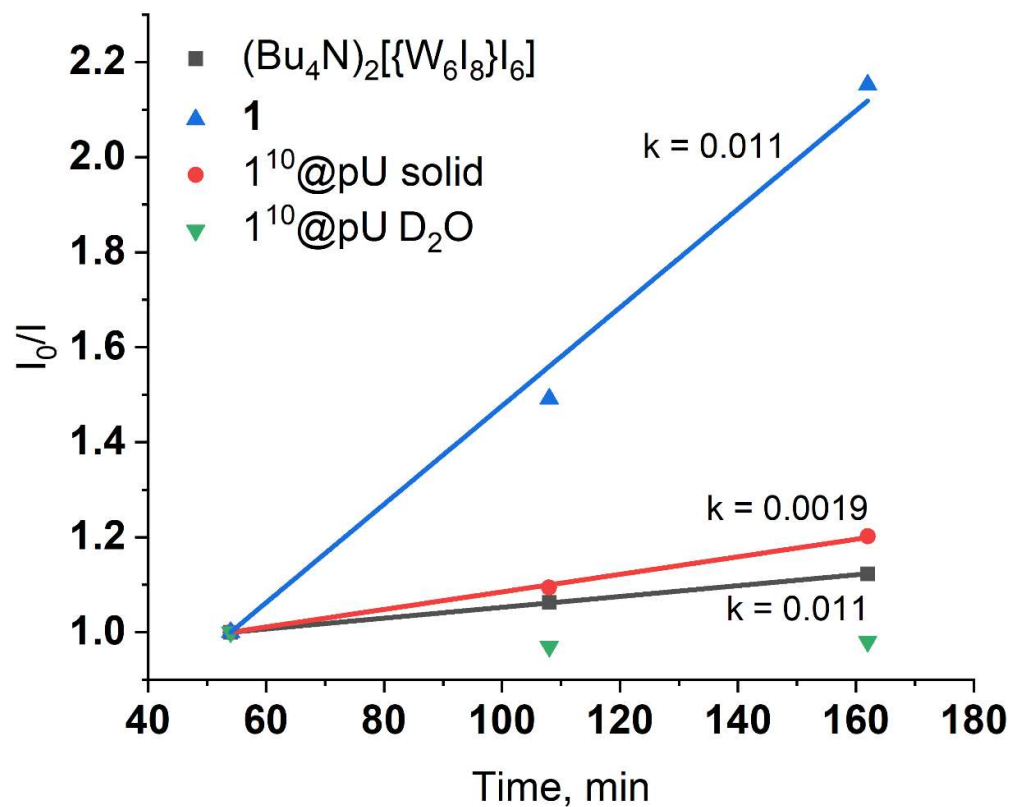

**Figure S9.**  $I_0/I$  vs irradiation time for XEOL spectra of molybdenum glass tube with  $\text{D}_2\text{O}$  and neat pU dispersion in  $\text{D}_2\text{O}$ .

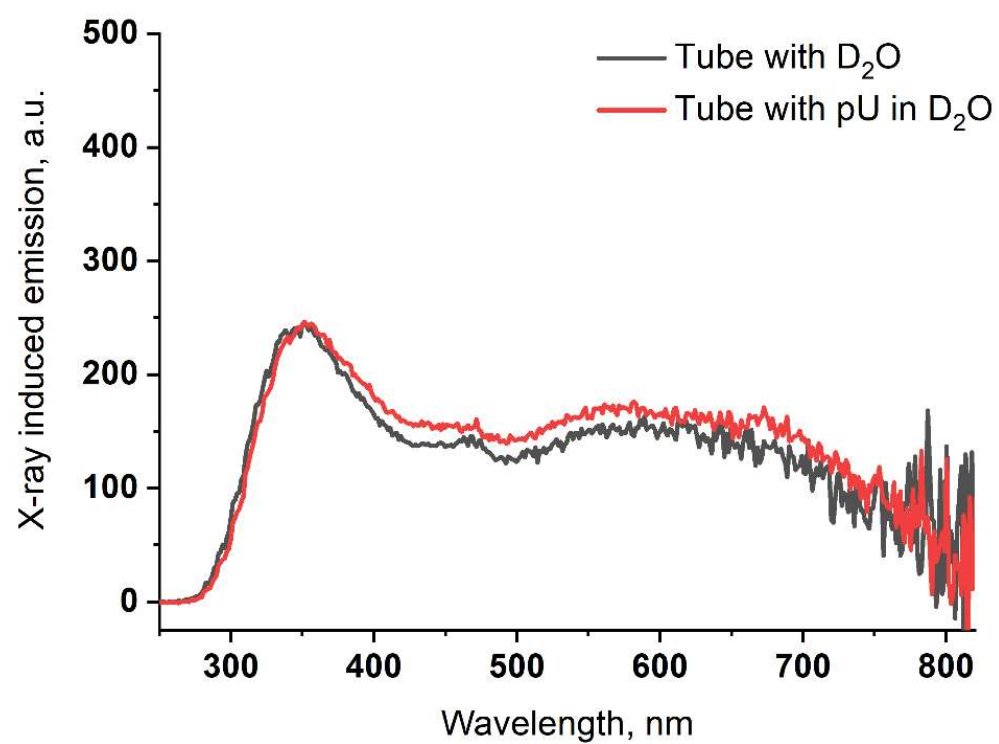

**Figure S10.** XEOL spectra of molybdenum glass tube with D<sub>2</sub>O and neat pU dispersion in D<sub>2</sub>O.
